# Supplementary material for: Best Practices: The Feasibility of Standardized Patient Assessments as a Best Practice in an Academic Training Program
Source: Atypon-hosted journal article supplement (doi:10.1176/appi.ps.002732012), 2013-03-01
Supplement: 209_ds001.pdf [file 209_ds001.pdf]

**Demographics of Faculty Supervisors (n=54)**

All faculty supervisors provided at least one-hour of individual resident supervision a week.

Responding faculty were 51% male, with a mean age of 49 (range 31-75). Approximately 27% indicated that they had an additional advanced degree (other than an MD) at the masters level or higher. On average, faculty had completed their residency training 17 years earlier (range 1-45).

Seventy-nine percent of faculty had also completed advanced fellowship training. Most faculty members (89%) reported primarily seeing patients in the outpatient setting. Thirty-two percent reported a voluntary or adjunct appointment with the department, with 58% indicating they were full-time and 9% part-time. On average faculty had 16 years experience in supervising medical trainees (range 1-45 years). Sixty-four percent indicated that they had prior clinical research experience systematically tracking patient symptoms over time.

**Figure 1.** Faculty (n=47-53) reporting use of standard assessments in their own clinical work and residents (n=31-32) reporting use of standard assessments recommended by faculty supervisors.

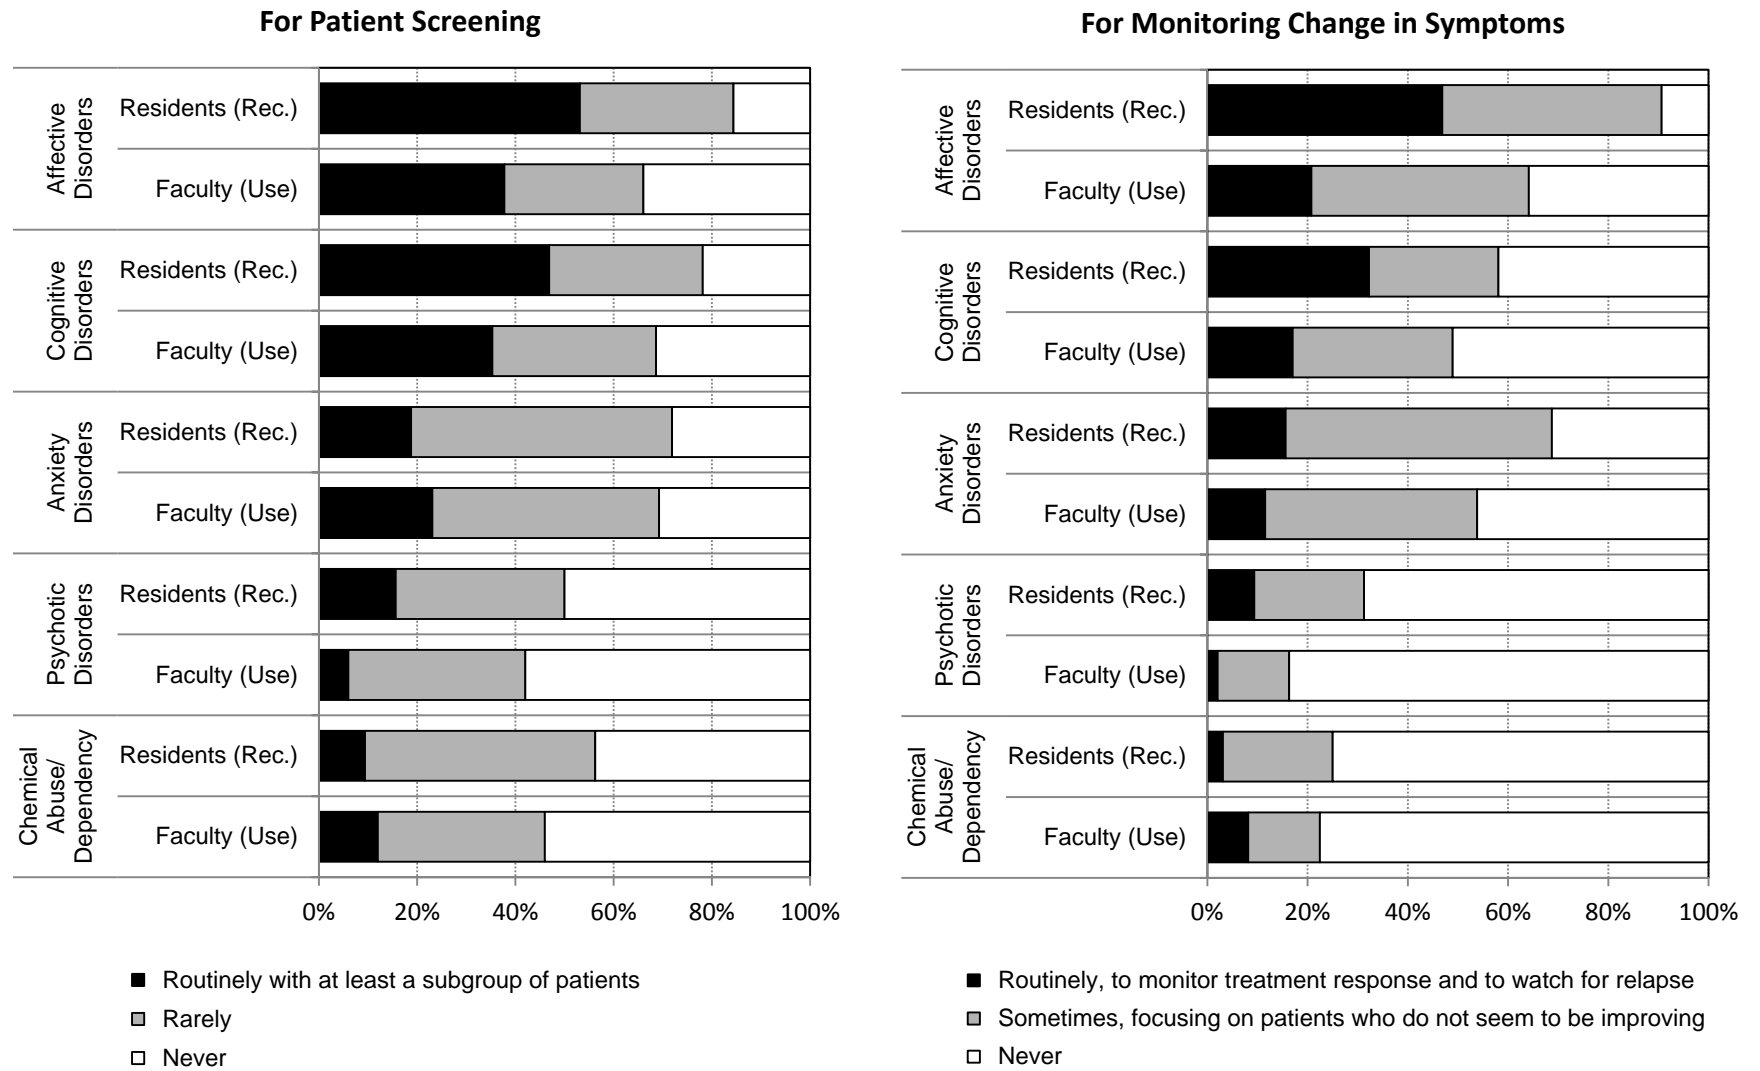

**Table 1.** Potential barriers in using standardized patient assessments in clinical practice.

|                                                                                                                                                       | Resident Responses (n=32) |     |                             |     | Faulty Responses (n=53) |     |                             |     |
|-------------------------------------------------------------------------------------------------------------------------------------------------------|---------------------------|-----|-----------------------------|-----|-------------------------|-----|-----------------------------|-----|
|                                                                                                                                                       | Top Barrier               |     | Among the Top Four Barriers |     | Top Barrier             |     | Among the Top Four Barriers |     |
|                                                                                                                                                       | N                         | %   | N                           | %   | N                       | %   | N                           | %   |
| I have limited formal training in how to administer and use standardized patient assessments.                                                         | 10                        | 31% | 19                          | 59% | 9                       | 17% | 24                          | 45% |
| Administering standardized patient assessments would be too time-consuming.                                                                           | 6                         | 19% | 20                          | 63% | 6                       | 11% | 21                          | 40% |
| I have limited access to standardized patient assessments.                                                                                            | 5                         | 16% | 17                          | 53% | 5                       | 9%  | 24                          | 45% |
| There is a lack of consensus about which standardized assessments would be most appropriate for my patients.                                          | 3                         | 9%  | 20                          | 63% | 4                       | 8%  | 19                          | 36% |
| Using a standardized assessment with a patient could inhibit building rapport and detract from the therapeutic relationship.                          | 2                         | 6%  | 15                          | 47% | 5                       | 9%  | 19                          | 36% |
| Completing standardized patient assessments is not required as part of my clinical work.                                                              | 2                         | 6%  | 7                           | 22% | 13                      | 25% | 22                          | 42% |
| I do not have a formal system (such as an electronic medical record) for tracking and monitoring the results of such assessments.                     | 1                         | 3%  | 9                           | 28% | 2                       | 4%  | 19                          | 36% |
| Completing standardized assessments/questionnaires requires cognitive or language skills that my patients don't have.                                 | 1                         | 3%  | 6                           | 19% | 2                       | 4%  | 4                           | 8%  |
| Completing standardized assessments/questionnaires requires insight that my patients don't have.                                                      | 1                         | 3%  | 4                           | 13% | 0                       | 0%  | 4                           | 8%  |
| Completing standardized patient assessments is not recommended in current APA treatment guidelines and is not considered part of "standard" practice. | 0                         | 0%  | 3                           | 9%  | 1                       | 2%  | 6                           | 11% |
| Other                                                                                                                                                 | 1                         | 3%  | 3                           | 9%  | 6                       | 11% | 10                          | 19% |

**Figure 2.** Faculty (n=47-53) and Residents (n=32) reporting agreement with attitudes about standard patient assessments (SPAs). Mean Likert scale scores are shown (-2=Strongly Disagree to 2=Strongly Agree) with 95% confidence intervals for the mean (shown as red error bars) and t-tests on the right. Resident responses are shown in black and faculty are shown in grey.

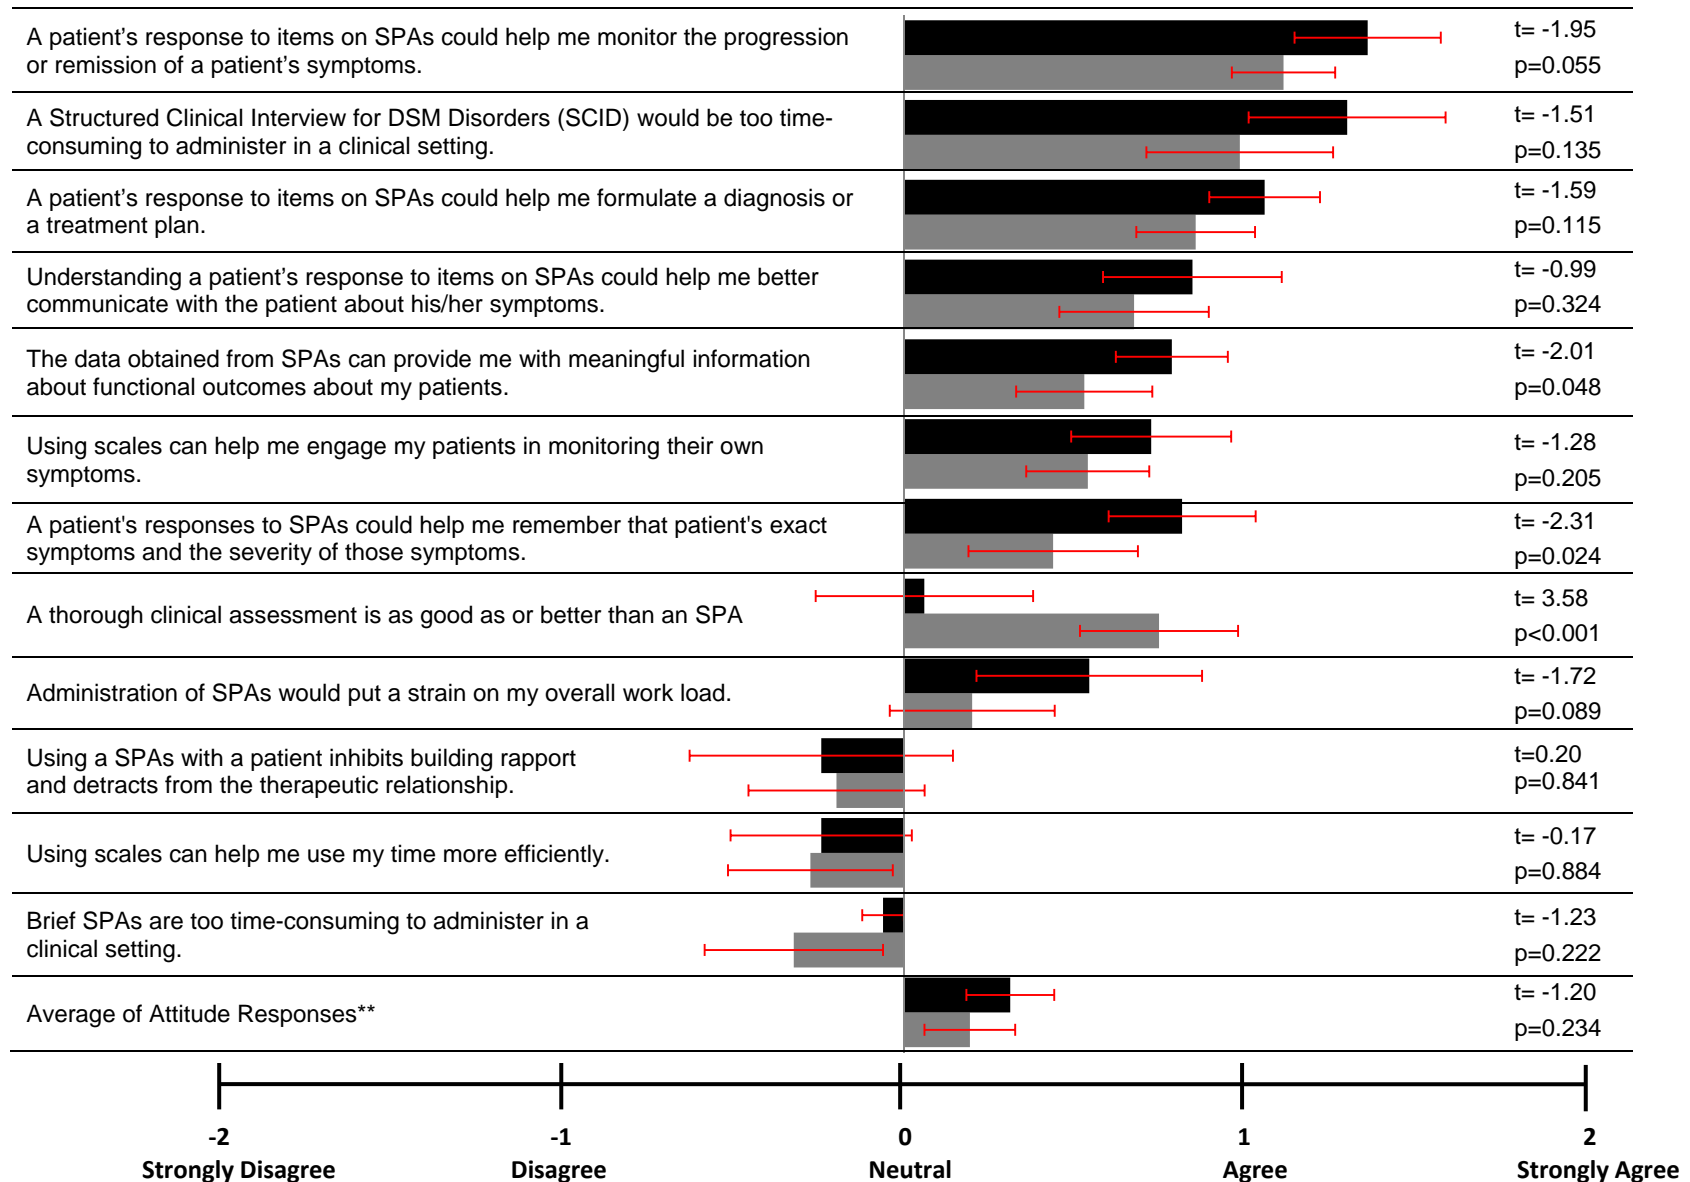

**Table 2.** Logistic regression of factors affecting faculty use of standard assessments for screening and monitoring patients.

| Factor                                                | Attitude Score‡     | Use for Patient Screening | Use for Patient Monitoring |
|-------------------------------------------------------|---------------------|---------------------------|----------------------------|
|                                                       | Odds Ratio (95% CI) | Odds Ratio (95% CI)       | Odds Ratio (95% CI)        |
| Age                                                   | 0.93 (0.88-0.99)*** | 0.84 (0.75-0.94)***       | 0.84 (0.73-0.96)**         |
| Has an Additional Degree                              | 2.00 (0.43-9.34)    | 2.17 (0.41-11.60)         | 0.32 (0.04-2.44)           |
| Employed Full or Part Time at an Academic Institution | 1.81 (0.40-8.31)    | 1.13 (0.19-6.55)          | 1.76 (0.11-10.23)          |
| Participated in a Research Study Tracking Symptoms    | 1.09 (0.27-4.32)    | 10.08 (1.51-67.08)**      | 3.96 (0.49-32.19)          |
| Average Attitude Score†                               | -                   | 0.21 (0.03-1.48)          | 6.21 (0.89-43.40)*         |

† Items which reflect a negative opinion about standard assessments are recoded such that strongly agree=-2 and strongly disagree=2, opposite the others.

‡ Attitude score as positive (average attitude > 0) or negative.

\*p <0.10, \*\*p <0.05, \*\*\*p<0.01
